# Supplementary material for: Sensory neurons couple arousal and foraging decisions in Caenorhabditis elegans
Source: eLife. 2023 Dec 27;12:RP88657. doi: 10.7554/eLife.88657 (PMC10752585; doi:10.7554/eLife.88657)
Supplement: Supplementary file 1. [file elife-88657-supp1.xlsx]

## Sheet: Sheet1
Supplementary File 1: Sensory neurons and endocrine systems implicated in roaming and leaving behavior*
Condition	Sensory/endocrine system	Effect	Evidence/mechanism	Citation
OP50 bacterial lawn	ciliated sensory neurons	Increase roaming	che-2 cilium structure mutant	Fujiwara 2002
	ciliated sensory neurons	Increase roaming	rescue of grk-2 mutant	Davis et al 2023
	tax-4-expressing neurons	Increase roaming	rescue of che-2 mutant	Fujiwara 2002
	AWC neurons	Increase roaming	ceh-36 mutant	Ben Arous 2009
	ASI neurons	Increase roaming	Tetanus toxin expression	Greene 2016
	BAG neurons	Increase roaming	Caspase induced ablation	Juozaityte 2017
	ASG neurons	Increase roaming	Caspase induced ablation	Juozaityte 2017
	ASJ neurons (male)	Increase leaving	rescue of daf-7 TGF-beta mutant	Hilbert 2017
	daf-2 insulin receptor	Increase roaming	mutant	Ben Arous 2009
	daf-7 TGF-beta	Increase roaming	mutant	Ben Arous 2009
OP50, icas#9 pheromone	ASJ neurons	Increase roaming	pheromone response, tetanus toxin expression	Greene 2016
	ADL neurons	Reduce roaming	pheromone response, tetanus toxin expression	Greene 2016
OP50, depleting lawn	BAG neurons	Increase leaving	rescue of tax-2 mutant, ablation	Milward 2011
	ASE neurons	Increase leaving	rescue of tax-2 mutant, ablation	Milward 2011
	URX/AQR/PQR neurons	Increase leaving	rescue of tax-2 mutant, ablation	Milward 2011
	AFD neurons	Increase leaving	rescue of tax-2 mutant	Milward 2011
	ADF neurons	Reduce leaving	rescue of ocr-2 mutant	Milward 2011
	ASI neurons	Increase leaving	rescue of daf-7 TGF-beta mutant	Milward 2011
	daf-2 insulin receptor	Increase leaving	mutant	Milward 2011
	daf-7 TGF-beta	Increase leaving	mutant	Milward 2011
Related behaviors (OP50)	ASI neurons	Increase quiescence	ablation	Gallagher 2013
*che-2, ceh-36, tax-2, tax-4, and ocr-2 mutations result in reduced sensory neuron function.
Studies in npr-1 and egl-4 mutants, which have an increased leaving rate, are not included because they have complex effects on neuronal activity.
Results addressing leaving from lawns of pathogenic bacteria were not included.
