# Supplementary material for: Sensory neurons couple arousal and foraging decisions in Caenorhabditis elegans
Source: eLife. 2023 Dec 27;12:RP88657. doi: 10.7554/eLife.88657 (PMC10752585; doi:10.7554/eLife.88657)
Supplement: Supplementary file 2. [file elife-88657-supp2.xlsx]

## Sheet: Table 2
Supplementary File 2a: Lawn Leaving Events Per minute Roaming/Dwelling
genotype/experiment	# assays	# events	fraction of time roaming	# mins roaming	# mins dwelling	# events while roaming	# events while dwelling	events/ assay	events/ min-roam	events/ min-dwell
wild type	1586	637	0.151871	9482.33	52954.3	509	128	0.401639	0.0536788	0.00241718
OD 1	45	47	0.337781	586.5	1154	44	3	1.04444	0.0750213	0.00259965
OD 2	46	27	0.197484	348	1414.17	23	4	0.586957	0.066092	0.00282852
OD 4	47	18	0.163907	298.667	1532.5	14	4	0.382979	0.046875	0.00261011
WT +DMSO (edible food)	66	22	0.108283	275.833	2312.17	20	2	0.333333	0.0725076	0.00086499
WT +DMSO+AZT (inedible food)	64	536	0.912942	1239.17	113.833	510	26	8.375	0.411567	0.228404
wild type	127	34	0.0555405	273.833	4704	18	16	0.267717	0.0657334	0.00340136
tph-1	139	134	0.326635	1709.5	3592.17	122	12	0.964029	0.0713659	0.0033406
wild type	76	26	0.0650618	195.5	2822.67	15	11	0.342105	0.0767263	0.00389702
cat-2	88	101	0.27395	926.5	2485.67	88	13	1.14773	0.0949811	0.00522999
wild type	90	43	0.21084	748.833	2815	41	2	0.477778	0.0547518	0.00071048
npr-1	91	345	0.608034	1917.33	1265	323	22	3.79121	0.168463	0.0173913
wild type	247	60	0.114036	1114.17	8678.5	41	19	0.242915	0.0367988	0.00218932
pdfr-1	265	98	0.0603277	627.167	9815.5	66	32	0.369811	0.105235	0.00326015
wild type	143	54	0.12865	726.167	4947.17	39	15	0.377622	0.0537067	0.00303204
tax-4	156	59	0.030971	187.333	5895.83	22	37	0.378205	0.117438	0.00627562
ASJ rescue	148	85	0.103633	582.333	5059.33	48	37	0.574324	0.082427	0.00731322
Leaving events while roaming are significantly elevated on inedible food and in npr-1 mutants.
Leaving rates while dwelling are significantly elevated on inedible food.
Supplementary File 2b: Lawn Leaving Events Per minute Roaming/Dwelling, Optogenetic Experiments
		# events		fraction of time roaming		# mins roaming		# mins dwelling		# events while roaming		# events while dwelling		# events/ min roaming		# events/ min dwelling
genotype/experiment	# assays	light OFF	light ON	light OFF	light ON	light OFF	light ON	light OFF	light ON	light OFF	light ON	light OFF	light ON	light OFF	light ON	light OFF	light ON
phx ReaChR -ATR	32	4	4	0.0622471	0.0597733	33.3333	29	509.833	461.833	2	4	2	0	0.06	0.137931	0.00392285	0
phx ReachR +ATR	36	2	83	0.0693565	0.745	43.8333	372.5	590.667	147.167	1	79	1	4	0.0228137	0.212081	0.001693	0.0271801
phx ReaChR	27	0	31	0.0919053	0.530031	43.3333	201.5	432.667	185.333	0	30	0	1	0	0.148883	0	0.00539568
pdfr-1; phx ReaChR	23	2	18	0.0311203	0.462582	12.5	153.5	398.167	189.833	1	16	1	2	0.08	0.104235	0.00251151	0.0105356
phx ReaChR	16	0	14	0.0715144	0.51799	19.8333	127.167	258.167	118.333	0	14	0	0	0	0.110092	0	0
tph-1; phx ReaChR	18	1	58	0.254984	0.934017	81	243	236.667	19.6667	1	56	0	2	0.0123457	0.230453	0	0.101695
wild type	34	6	8	0.168386	0.182988	100.667	97.1667	501.833	435.333	4	7	2	1	0.0397351	0.0720412	0.00398539	0.00229709
RIB BlaC	35	22	69	0.145993	0.902732	88.6667	451.667	518.667	48.6667	15	67	7	2	0.169173	0.148339	0.0134961	0.0410959
phx ReaChR	70	13	139	0.118417	0.690635	144.667	656.333	1087.17	311.5	8	135	5	4	0.0552995	0.205688	0.00459911	0.0128411
tax-4; phx ReaChR	66	18	36	0.0892992	0.593215	98.3333	582.833	1024.67	417.667	9	34	9	2	0.0915254	0.0583357	0.00878334	0.00478851
tax-4 ASJ+; phx ReaChR	68	34	147	0.125211	0.690224	135.833	620.167	956	280.667	21	134	13	13	0.154601	0.216071	0.0135983	0.0463183
Leaving events while roaming are increased by feeding inhibition in wild type but not in tax-4 mutants
