# Supplementary material for: Sensory neurons couple arousal and foraging decisions in Caenorhabditis elegans
Source: eLife. 2023 Dec 27;12:RP88657. doi: 10.7554/eLife.88657 (PMC10752585; doi:10.7554/eLife.88657)
Supplement: Supplementary file 3. [file elife-88657-supp3.xlsx]

## Sheet: Sheet1
Supplementary File 3: Strains and Plasmids
Figures	Strain	Strain Name	Genotype	Notes	Original citation
all figures	wild type	PD1074	wild type	https://wormbase.org/species/c_elegans/strain/WBStrain00030553#03--10	Yoshimura, et al (2019)
Figure 4 - control for tph-1 and cat-2	wild type	CX0001	wild type	Bargmann lab strain of N2 (Bristol) strain
Figure 3, 6 and supplements	pharynx ReaChR	CX16279	kyEx5552[myo-2::ReaChR::sl2-GFP ; myo-3::mCherry]	Strain generated by Steve Flavell	This work
Figure 4	pdfr-1	CX14295	pdfr-1(ok3425) III	VC2609 outcrossed to N2 5x	Flavell, et al (2013)
Figure 4	tph-1	MT15434	tph-1(mg280) II	Backcrossed tph-1(mg280) allele.	https://cgc.umn.edu/strain/MT15434
Figure 4	cat-2	CX11078	cat-2(e1112) II	cat-2(e1112) outcrossed 6x	Stern, et al (2017)
Figure 4	npr-1	CX13663	npr-1(ad609) X	DA609 outcrossed to N2 2X more (total 4X)	Jang. et al (2017)
Figure 4 - supplement 1	pharynx ReaChR; pdfr-1	CX16528	pdfr-1(ok3425) III; kyEx5552[myo-2::ReaChR::sl2-GFP ; myo-3::mCherry]	CX16279 crossed into pdfr-1(ok3425)	This work
Figure 4 - supplement 1	pharynx ReaChR; tph-1	CX16529	tph-1(mg280) II; kyEx5552[myo-2::ReaChR::sl2-GFP ; myo-3::mCherry]	CX16279 crossed into tph-1(mg280)	This work
Figure 5, Figure 5 - supplement S3	RIB::BlaC	CX18471	kyEx6634[sto-3::BlaC-sl2-GFP, myo-3::mCherry]		This work
Figure 5 - supplement 1	PCR fragment #1; pdfr-1	CX14378	pdfr-1(ok3425) III ; kyEx4576[10kB genomic PCR of pdfr-1; myo-3::GFP]	Genomic PCR lacks upstream promoter.	Flavell, et al (2013)
Figure 5 - supplement 1	PCR fragment #2; pdfr-1	CX14383	pdfr-1(ok3425) III ; kyEx4581[24kB genomic PCR of pdfr-1; myo-3::GFP]	Genomic PCR includes upstream promoter.	Flavell, et al (2013)
Figure 5 - supplement 2	pdfr-1::CreONpdfr-1	CX14485	pdfr-1(ok3425) III ; kyEx4648[pdfr-1(upstream)::inv[pdfr-1::sl2GFP] ; myo-2::mCherry ]		Flavell, et al (2013)
Figure 5 - supplement 2	RIB pdfr-1 rescue; pdfr-1	CX18302	pdfr-1(ok3425) III ; kyEx4648[pdfr-1(upstream)::inv[pdfr-1::sl2GFP] ; myo-2::mCherry], kyEx6568[sto-3::nCre, myo-3::mCherry]		This work
Figure 5 - supplement 2	pan-neuronal pdfr-1 rescue; pdfr-1	CX14488	pdfr-1(ok3425) III ; kyEx4648[pdfr-1(upstream)::inv[pdfr-1::sl2GFP] ; myo-2::mCherry], kyEx4651[h20::nCre, myo-3::mCherry]		Flavell, et al (2013)
Figure 5 - supplement 2	AIY, RIM, RIA pdfr-1 rescue; pdfr-1	CX14271	pdfr-1(ok3425) III ; kyEx4648[pdfr-1(upstream)::inv[pdfr-1::sl2GFP] ; myo-2::mCherry], kyEx4896[mod-1::nCre, glr-3::nCre, tdc-1::nCre, myo-3::mCherry]		Flavell, et al (2013)
Figure 6, Figure 6 - supplement 1, 2	tax-4	CX13078	tax-4(p678) III	CX2948 outcrossed to N2 5x	Worthy, et al (2018)
Figure 6, Figure 6 - supplement 2	ASJ rescue; tax-4	CX11118	tax-4(p678) III; kyEx2933[srh-11::tax-4-SL2GFP; elt-2::GFP]		Macosko, et al (2009)
Figure 6 - supplement 2	ASK rescue; tax-4	CX13361	tax-4(p678) III; kyEx3947[sra-9::tax-4-SL2GFP; elt-2::mCherry]	Strain generated by Elizabeth Glater	This work
Figure 6 - supplement 2	ASJ+ASK rescue; tax-4	CX11110	tax-4(p678) III; kyEx2925[srh-11::tax-4-SL2GFP; sra-9::tax-4-SL2GFP ; elt-2::GFP]		Macosko, et al (2009)
Figure 6 - supplement 2	AWC rescue; tax-4	CX13790	tax-4(p678) III; kyEx4233[ceh-36*::tax-4-SL2GFP; myo-3::mCherry]		Worthy, et al (2018)
Figure 6 - supplement 2	ASI rescue; tax-4	CX11558	tax-4(p678) III; kyEx3083[str-3::tax-4-SL2GFP; elt-2::GFP]		Macosko, et al (2009)
Figure 6 - supplement 2	URX/AQR/PQR rescue; tax-4	CX11113	tax-4(p678) III; kyEx2928[gcy-36::tax-4-SL2GFP; elt-2::GFP injected]		Macosko, et al (2009)
Figure 6, Figure 6 - supplement 3	pharynx ReaChR; tax-4	CX18452	tax-4(p678) III; kyEx5552[myo-2::ReaChR::sl2-GFP ; myo-3::mCherry]		This work
Figure 6, Figure 6 - supplement 3	pharynx ReaChR; tax-4; ASJ rescue	CX18538	tax-4(p678) III; kyEx5552[myo-2::ReaChR::sl2-GFP ; myo-3::mCherry]; kyEx2933[srh-11::tax-4-SL2GFP; elt-2::GFP]		This work
Figures	Plasmids	Explanation
Figure 5, Figure 5 - supplement S3	pES19, sto-3p::BlAC-sl2-GFP	RIB::BlaC
Figure 5 - supplement S2	pES13, sto-3p::nCre	RIB::Cre
