# Supplementary material for: Sensory neurons couple arousal and foraging decisions in Caenorhabditis elegans
Source: eLife. 2023 Dec 27;12:RP88657. doi: 10.7554/eLife.88657 (PMC10752585; doi:10.7554/eLife.88657)
Supplement: Supplementary file 4. [file elife-88657-supp4.xlsx]

## Sheet: Sheet1
Supplementary File 4: p-values and Statistical Tests
Figure Panel	Quantity	Comparison	p-value	Significance	Statistical test
2-S1E	duration of roaming states	before lawn leaving events, NOT before lawn leaving events	4.87696e-06	****	Kolmogorov-Smirnov 2-sample test		all statistical tests performed at alpha = 0.05
2-S1H	fraction of time roaming	small lawns, uniform lawns	0.035805	*	logit-transformation, t-test		all statistical tests are two-sided
2-S4A,B	lawn boundary distance	roaming states, dwelling states	6.28968e-227	****	Kolmogorov-Smirnov 2-sample test		ns p > 0.05, * p < 0.05, ** p < 0.01, *** p < 10-3 ,**** p < 10-4
2-S4C,D	lawn boundary distance	state 0, state 1	2.1974e-14	****	Kolmogorov-Smirnov 2-sample test, Bonferroni correction
2-S4C,D	lawn boundary distance	state 0, state 2	4.49298e-43	****	Kolmogorov-Smirnov 2-sample test, Bonferroni correction
2-S4C,D	lawn boundary distance	state 0, state 3	4.1364737e-317	****	Kolmogorov-Smirnov 2-sample test, Bonferroni correction
2-S4C,D	lawn boundary distance	state 1, state 2	1.97551e-37	****	Kolmogorov-Smirnov 2-sample test, Bonferroni correction
2-S4C,D	lawn boundary distance	state 1, state 3	<1e-317	****	Kolmogorov-Smirnov 2-sample test, Bonferroni correction
2-S4C,D	lawn boundary distance	state 2, state 3	5.4896e-203	****	Kolmogorov-Smirnov 2-sample test, Bonferroni correction
3A	fraction of time roaming	OD 1, OD 2	0.001	***	logit-transformation, One way ANOVA, Tukey's post-hoc test
3A	fraction of time roaming	OD 1, OD 4	0.001	***	logit-transformation, One way ANOVA, Tukey's post-hoc test
3A	fraction of time roaming	OD 2, OD 4	0.459662	ns	logit-transformation, One way ANOVA, Tukey's post-hoc test
3B	# lawn leaving events	OD 1, OD 2	0.124401	ns	Kruskal-Wallis; Dunn's correction
3B	# lawn leaving events	OD 1, OD 4	0.00761706	**	Kruskal-Wallis; Dunn's correction
3B	# lawn leaving events	OD 2, OD 4	0.989519	ns	Kruskal-Wallis; Dunn's correction
3C	fraction of time roaming	+DMSO, +DMSO+aztreonam	1.46389e-46	****	logit-transformation, t-test
3D	# lawn leaving events	+DMSO, +DMSO+aztreonam	6.33377e-23	****	Mann-Whitney U test
3F	fraction of animals roaming	-ATR, +ATR, minutes 0-10	0.0351965	*	logit-transformation, t-test
3F	fraction of animals roaming	-ATR, +ATR, minutes 12-20	2.92782e-16	****	logit-transformation, t-test
3F	fraction of animals roaming	-ATR, +ATR, minutes 22-30	0.0350343	*	logit-transformation, t-test
3G	fraction of animals leaving	+ATR: light OFF, light ON	3.96703e-07	****	Fisher's Exact Test
3H	# lawn leaving events	+ATR: light OFF, light ON	1.63934e-05	****	Wilcoxon rank-sum test
3I	time to first lawn leaving event, light ON	-ATR, +ATR	9.5117e-09	****	Kolmogorov-Smirnov 2-sample test
3I	time to first head poke, light ON	-ATR, +ATR	6.21558e-08	****	Kolmogorov-Smirnov 2-sample test
3J	roaming speed	min -3 to -1, last 30 sec.	9.49e-08	****	Wilcoxon rank-sum test
3-S1A	fraction of time roaming	PRE+DMSO, PRE+aztreonam	0.001	***	logit-transformation, One way ANOVA, Tukey's post-hoc test
3-S1A	fraction of time roaming	PRE+DMSO, POST+DMSO	0.00286339	**	logit-transformation, One way ANOVA, Tukey's post-hoc test
3-S1A	fraction of time roaming	PRE+DMSO, POST+aztreonam	0.00785638	**	logit-transformation, One way ANOVA, Tukey's post-hoc test
3-S1A	fraction of time roaming	PRE+aztreonam, POST+DMSO	0.001	***	logit-transformation, One way ANOVA, Tukey's post-hoc test
3-S1A	fraction of time roaming	PRE+aztreonam, POST+aztreonam	0.001	***	logit-transformation, One way ANOVA, Tukey's post-hoc test
3-S1A	fraction of time roaming	POST+DMSO, POST+aztreonam	0.9	ns	logit-transformation, One way ANOVA, Tukey's post-hoc test
3-S1B	# lawn leaving events	PRE+DMSO, PRE+aztreonam	3.45e-05	****	Kruskal-Wallis; Dunn's correction
3-S1B	# lawn leaving events	PRE+DMSO, POST+DMSO	1	ns	Kruskal-Wallis; Dunn's correction
3-S1B	# lawn leaving events	PRE+DMSO, POST+aztreonam	1	ns	Kruskal-Wallis; Dunn's correction
3-S1B	# lawn leaving events	PRE+aztreonam, POST+DMSO	6.83e-06	****	Kruskal-Wallis; Dunn's correction
3-S1B	# lawn leaving events	PRE+aztreonam, POST+aztreonam	1.42e-05	****	Kruskal-Wallis; Dunn's correction
3-S1B	# lawn leaving events	POST+DMSO, POST+aztreonam	1	ns	Kruskal-Wallis; Dunn's correction
3-S1C	roaming speed	min -3 to -1, last 30 sec.	7.76e-10	****	Wilcoxon rank-sum test
3-S1D	fraction of time roaming	-ATR: light OFF, light ON	0.940422	ns	logit-transformation, paired t-test
3-S1E	fraction of time roaming	+ATR: light OFF, light ON	1.32511e-09	****	logit-transformation, paired t-test
3-S1F	fraction of animals leaving	-ATR: light OFF, light ON	0.707846	ns	Fisher's Exact Test
3-S1G	# lawn leaving events	-ATR: light OFF, light ON	0.705457	ns	Wilcoxon rank-sum test
3-S1H	time to first lawn leaving event, light OFF	-ATR, +ATR	0.998338	ns	Kolmogorov-Smirnov 2-sample test
3-S1H	time to first head poke, light OFF	-ATR, +ATR	0.168415	ns	Kolmogorov-Smirnov 2-sample test
3-S1I	fraction of time roaming	-ATR, +ATR	0.191842	ns	logit-transformation, t-test
3-S1J	# lawn leaving events	-ATR, +ATR	0.360096	ns	Mann-Whitney U test
4A	fraction of time roaming	wild type, tph-1	2.58e-39	****	logit-transformation, t-test
4B	fraction of time roaming	wild type, cat-2	3.19e-23	****	logit-transformation, t-test
4C	fraction of time roaming	wild type, npr-1	8.45e-22	****	logit-transformation, t-test
4D	fraction of time roaming	wild type, pdfr-1	1.01e-24	****	logit-transformation, t-test
4E	# lawn leaving events	wild type, tph-1	0.00057184	***	Mann-Whitney U test
4F	# lawn leaving events	wild type, cat-2	0.00539752	**	Mann-Whitney U test
4G	# lawn leaving events	wild type, npr-1	2.96e-17	****	Mann-Whitney U test
4H	# lawn leaving events	wild type, pdfr-1	0.208811	ns	Mann-Whitney U test
4I	fraction of animals roaming, last 2 minutes	wild type, tph-1	4.54236e-18	****	logit-transformation, t-test
4I	fraction of time roaming per animal that left	wild type, tph-1	2.47332e-11	****	logit-transformation, t-test
4J	fraction of animals roaming, last 2 minutes	wild type, cat-2	2.63847e-10	****	logit-transformation, t-test
4J	fraction of time roaming per animal that left	wild type, cat-2	2.75149e-07	****	logit-transformation, t-test
4K	fraction of animals roaming, last 2 minutes	wild type, npr-1	7.56425e-05	****	logit-transformation, t-test
4K	fraction of time roaming per animal that left	wild type, npr-1	7.24256e-05	****	logit-transformation, t-test
4L	fraction of animals roaming, last 2 minutes	wild type, pdfr-1	0.682311	ns	logit-transformation, t-test
4L	fraction of time roaming per animal that left	wild type, pdfr-1	0.242409	ns	logit-transformation, t-test
4M	roaming speed	tph-1: min -3 to -1, last 30 sec.	1.23e-10	****	Wilcoxon rank-sum test
4N	roaming speed	cat-2: min -3 to -1, last 30 sec.	2.51e-05	****	Wilcoxon rank-sum test
4O	roaming speed	npr-1: min -3 to -1, last 30 sec.	5.01e-06	****	Wilcoxon rank-sum test
4P	roaming speed	pdfr-1: min -3 to -1, last 30 sec.	0.00083067	***	Wilcoxon rank-sum test
4-S1A	fraction of animals roaming	wild type, pdfr-1, minutes 0-10	0.0547969	ns	logit-transformation, t-test
4-S1A	fraction of animals roaming	wild type, pdfr-1, minutes 12-20	0.178376	ns	logit-transformation, t-test
4-S1A	fraction of animals roaming	wild type, pdfr-1, minutes 22-30	0.686392	ns	logit-transformation, t-test
4-S1A	fraction of time roaming: light ON - light OFF	wild type, pdfr-1	0.642325	ns	logit-transformation, t-test
4-S1B	# lawn leaving events	wild type: light OFF, light ON	0.00037794	***	Wilcoxon rank-sum test
4-S1B	# lawn leaving events	pdfr-1: light OFF, light ON	0.00456241	**	Wilcoxon rank-sum test
4-S1B	# lawn leaving events: light ON - light OFF	wild type, pdfr-1	0.25691	ns	Mann-Whitney U test
4-S1C	fraction of animals roaming	wild type, tph-1, minutes 0-10	0.210377	ns	logit-transformation, t-test
4-S1C	fraction of animals roaming	wild type, tph-1, minutes 12-20	0.0101392	*	logit-transformation, t-test
4-S1C	fraction of animals roaming	wild type, tph-1, minutes 22-30	0.478882	ns	logit-transformation, t-test
4-S1C	fraction of time roaming: light ON - light OFF	wild type, tph-1	0.153684	ns	logit-transformation, t-test
4-S1D	# lawn leaving events	wild type: light OFF, light ON	0.00655689	**	Wilcoxon rank-sum test
4-S1D	# lawn leaving events	tph-1: light OFF, light ON	0.00095345	***	Wilcoxon rank-sum test
4-S1D	# lawn leaving events: light ON - light OFF	wild type, tph-1	0.0256436	*	Mann-Whitney U test
5C	fraction of animals roaming	wild type, RIB::BlaC, minutes 0-10	0.913247	ns	logit-transformation, t-test
5C	fraction of animals roaming	wild type, RIB::BlaC, minutes 12-20	9.88862e-17	****	logit-transformation, t-test
5C	fraction of animals roaming	wild type, RIB::BlaC, minutes 22-30	0.138668	ns	logit-transformation, t-test
5D	fraction of animals leaving	RIB::BlaC: light OFF, light ON	0.000700419	***	Fisher's Exact Test
5E	# lawn leaving events	RIB::BlaC: light OFF, light ON	0.00022843	***	Wilcoxon rank-sum test
5F	time to first lawn leaving event, light ON	wild type, RIB::BlaC	1.2593e-06	****	Kolmogorov-Smirnov 2-sample test
5F	time to first head poke, light ON	wild type, RIB::BlaC	0.000434774	***	Kolmogorov-Smirnov 2-sample test
5-S1B	fraction of time roaming	wild type, pdfr-1	0.001	***	logit-transformation, One way ANOVA, Tukey's post-hoc test
5-S1B	fraction of time roaming	wild type, PCR fragment #1; pdfr-1	0.001	***	logit-transformation, One way ANOVA, Tukey's post-hoc test
5-S1B	fraction of time roaming	wild type, PCR fragment #2; pdfr-1	0.0789087	ns	logit-transformation, One way ANOVA, Tukey's post-hoc test
5-S1B	fraction of time roaming	pdfr-1, PCR fragment #1; pdfr-1	0.3991	ns	logit-transformation, One way ANOVA, Tukey's post-hoc test
5-S1B	fraction of time roaming	pdfr-1, PCR fragment #2; pdfr-1	0.001	***	logit-transformation, One way ANOVA, Tukey's post-hoc test
5-S1B	fraction of time roaming	PCR fragment #1; pdfr-1, PCR fragment #2; pdfr-1	0.001	***	logit-transformation, One way ANOVA, Tukey's post-hoc test
5-S2B	fraction of time roaming	wild type, pdfr-1::CreONpdfr-1; pdfr-1	0.001	***	logit-transformation, One way ANOVA, Tukey's post-hoc test
5-S2B	fraction of time roaming	wild type, AIY-RIM-RIA::Cre; pdfr-1	0.001	***	logit-transformation, One way ANOVA, Tukey's post-hoc test
5-S2B	fraction of time roaming	wild type, pan-neuronal::Cre; pdfr-1	0.001	***	logit-transformation, One way ANOVA, Tukey's post-hoc test
5-S2B	fraction of time roaming	pdfr-1::CreONpdfr-1; pdfr-1, AIY-RIM-RIA::Cre; pdfr-1	0.9	ns	logit-transformation, One way ANOVA, Tukey's post-hoc test
5-S2B	fraction of time roaming	pdfr-1::CreONpdfr-1; pdfr-1, pan-neuronal::Cre; pdfr-1	0.001	***	logit-transformation, One way ANOVA, Tukey's post-hoc test
5-S2B	fraction of time roaming	AIY-RIM-RIA::Cre; pdfr-1, pan-neuronal::Cre; pdfr-1	0.001	***	logit-transformation, One way ANOVA, Tukey's post-hoc test
5-S2C	fraction of time roaming	wild type, pdfr-1::CreONpdfr-1; pdfr-1	0.001	***	logit-transformation, One way ANOVA, Tukey's post-hoc test
5-S2C	fraction of time roaming	wild type, RIB::Cre; pdfr-1	0.012956	*	logit-transformation, One way ANOVA, Tukey's post-hoc test
5-S2C	fraction of time roaming	wild type, pan-neuronal::Cre; pdfr-1	0.0326369	*	logit-transformation, One way ANOVA, Tukey's post-hoc test
5-S2C	fraction of time roaming	pdfr-1::CreONpdfr-1; pdfr-1, RIB::Cre; pdfr-1	0.00536068	**	logit-transformation, One way ANOVA, Tukey's post-hoc test
5-S2C	fraction of time roaming	pdfr-1::CreONpdfr-1; pdfr-1, pan-neuronal::Cre; pdfr-1	0.00241169	**	logit-transformation, One way ANOVA, Tukey's post-hoc test
5-S2C	fraction of time roaming	RIB::Cre; pdfr-1, pan-neuronal::Cre; pdfr-1	0.9	ns	logit-transformation, One way ANOVA, Tukey's post-hoc test
5-S3A	fraction of time roaming	wild type: light OFF, light ON	0.177973	ns	logit-transformation, paired t-test
5-S3B	fraction of time roaming	RIB::BlaC: light OFF, light ON	1.21e-12	****	logit-transformation, paired t-test
5-S3C	fraction of animals leaving	wild type: light OFF, light ON	1	ns	Fisher's Exact Test
5-S3D	# lawn leaving events	wild type: light OFF, light ON	0.617075	ns	Wilcoxon rank-sum test
5-S3E	time to first lawn leaving event, light OFF	wild type, RIB::BlaC	0.948689	ns	Kolmogorov-Smirnov 2-sample test
5-S3E	time to first head poke, light OFF	wild type, RIB::BlaC	0.0730905	ns	Kolmogorov-Smirnov 2-sample test
5-S3F	roaming speed	RIB::BlaC: min -3 to -1, last 30 sec.	0.00266241	**	Wilcoxon rank-sum test
6A	fraction of time roaming	wild type, tax-4	0.001	***	logit-transformation, One way ANOVA, Tukey's post-hoc test
6A	fraction of time roaming	wild type, ASJ rescue	0.0636279	ns	logit-transformation, One way ANOVA, Tukey's post-hoc test
6A	fraction of time roaming	tax-4, ASJ rescue	0.001	***	logit-transformation, One way ANOVA, Tukey's post-hoc test
6B	# lawn leaving events	wild type, tax-4	0.0421701	*	Kruskal-Wallis; Dunn's correction
6B	# lawn leaving events	wild type, ASJ rescue	0.00109469	**	Kruskal-Wallis; Dunn's correction
6B	# lawn leaving events	tax-4, ASJ rescue	0.855832	ns	Kruskal-Wallis; Dunn's correction
6C	fraction of animals roaming, last 2 minutes	wild type, tax-4	1.61233e-14	****	logit-transformation, t-test, Bonferroni correction
6C	fraction of animals roaming, last 2 minutes	wild type, ASJ rescue	8.93859e-07	****	logit-transformation, t-test, Bonferroni correction
6C	fraction of animals roaming, last 2 minutes	tax-4, ASJ rescue	0.00037761	***	logit-transformation, t-test, Bonferroni correction
6C	fraction of time roaming per animal that left	wild type, tax-4	2.60465e-09	****	logit-transformation, t-test, Bonferroni correction
6C	fraction of time roaming per animal that left	wild type, ASJ rescue	0.000242448	***	logit-transformation, t-test, Bonferroni correction
6C	fraction of time roaming per animal that left	tax-4, ASJ rescue	0.00155498	**	logit-transformation, t-test, Bonferroni correction
6D	fraction of time roaming	wild type: light OFF, light ON	1.01447e-17	****	logit-transformation, paired t-test
6D	fraction of time roaming	tax-4: light OFF, light ON	2.01447e-16	****	logit-transformation, paired t-test
6D	fraction of time roaming	ASJ rescue: light OFF, light ON	1.32711e-14	****	logit-transformation, paired t-test
6D	Δ fraction of time roaming: light ON - OFF	wild type, tax-4	0.301091	ns	logit-transformation, One way ANOVA, Tukey's post-hoc test
6D	Δ fraction of time roaming: light ON - OFF	wild type, ASJ rescue	0.610597	ns	logit-transformation, One way ANOVA, Tukey's post-hoc test
6D	Δ fraction of time roaming: light ON - OFF	tax-4, ASJ rescue	0.827392	ns	logit-transformation, One way ANOVA, Tukey's post-hoc test
6E	# lawn leaving events	wild type: light OFF, light ON	1.56049e-09	****	Wilcoxon rank-sum test
6E	# lawn leaving events	tax-4: light OFF, light ON	0.00743779	**	Wilcoxon rank-sum test
6E	# lawn leaving events	ASJ rescue: light OFF, light ON	2.41726e-07	****	Wilcoxon rank-sum test
6E	Δ lawn leaving events: light ON - OFF	wild type, tax-4	2.6664e-05	****	Kruskal-Wallis; Dunn's correction
6E	Δ lawn leaving events: light ON - OFF	wild type, ASJ rescue	0.601521	ns	Kruskal-Wallis; Dunn's correction
6E	Δ lawn leaving events: light ON - OFF	tax-4, ASJ rescue	0.00490123	**	Kruskal-Wallis; Dunn's correction
6-S1A	roaming duration overall	wild type, tax-4	9.36988e-16	****	Kolmogorov-Smirnov 2-sample test, Bonferroni correction
6-S1A	roaming duration overall	wild type, ASJ rescue	0.00388086	**	Kolmogorov-Smirnov 2-sample test, Bonferroni correction
6-S1A	roaming duration overall	tax-4, ASJ rescue	5.0152e-07	****	Kolmogorov-Smirnov 2-sample test, Bonferroni correction
6-S1B	roaming duration before leaving	wild type, tax-4	1.54838e-08	****	Kolmogorov-Smirnov 2-sample test, Bonferroni correction
6-S1B	roaming duration before leaving	wild type, ASJ rescue	0.0182142	*	Kolmogorov-Smirnov 2-sample test, Bonferroni correction
6-S1B	roaming duration before leaving	tax-4, ASJ rescue	0.00788239	**	Kolmogorov-Smirnov 2-sample test, Bonferroni correction
6-S2A	fraction of animals roaming	wild type, tax-4	0.001	***	logit-transformation, One way ANOVA, Tukey's post-hoc test
6-S2A	fraction of animals roaming	wild type, ASJ rescue	0.0159558	*	logit-transformation, One way ANOVA, Tukey's post-hoc test
6-S2A	fraction of animals roaming	wild type, ASK rescue	0.001	***	logit-transformation, One way ANOVA, Tukey's post-hoc test
6-S2A	fraction of animals roaming	wild type, ASJ+ASK rescue	0.0283438	*	logit-transformation, One way ANOVA, Tukey's post-hoc test
6-S2A	fraction of animals roaming	tax-4, ASJ rescue	0.001	***	logit-transformation, One way ANOVA, Tukey's post-hoc test
6-S2A	fraction of animals roaming	tax-4, ASK rescue	0.9	ns	logit-transformation, One way ANOVA, Tukey's post-hoc test
6-S2A	fraction of animals roaming	tax-4, ASJ+ASK rescue	0.001	***	logit-transformation, One way ANOVA, Tukey's post-hoc test
6-S2A	fraction of animals roaming	ASJ rescue, ASK rescue	0.001	***	logit-transformation, One way ANOVA, Tukey's post-hoc test
6-S2A	fraction of animals roaming	ASJ rescue, ASJ+ASK rescue	0.9	ns	logit-transformation, One way ANOVA, Tukey's post-hoc test
6-S2A	fraction of animals roaming	ASK rescue, ASJ+ASK rescue	0.001	***	logit-transformation, One way ANOVA, Tukey's post-hoc test
6-S2B	# lawn leaving events	wild type, tax-4	1	ns	Kruskal-Wallis; Dunn's correction
6-S2B	# lawn leaving events	wild type, ASJ rescue	0.0283313	*	Kruskal-Wallis; Dunn's correction
6-S2B	# lawn leaving events	wild type, ASK rescue	0.00138337	**	Kruskal-Wallis; Dunn's correction
6-S2B	# lawn leaving events	wild type, ASJ+ASK rescue	0.961774	ns	Kruskal-Wallis; Dunn's correction
6-S2B	# lawn leaving events	tax-4, ASJ rescue	0.0576146	ns	Kruskal-Wallis; Dunn's correction
6-S2B	# lawn leaving events	tax-4, ASK rescue	0.000271051	***	Kruskal-Wallis; Dunn's correction
6-S2B	# lawn leaving events	tax-4, ASJ+ASK rescue	1	ns	Kruskal-Wallis; Dunn's correction
6-S2B	# lawn leaving events	ASJ rescue, ASK rescue	1.05848e-10	****	Kruskal-Wallis; Dunn's correction
6-S2B	# lawn leaving events	ASJ rescue, ASJ+ASK rescue	1	ns	Kruskal-Wallis; Dunn's correction
6-S2B	# lawn leaving events	ASK rescue, ASJ+ASK rescue	2.16249e-07	****	Kruskal-Wallis; Dunn's correction
6-S2C	fraction of time roaming	wild type, tax-4	0.001	***	logit-transformation, One way ANOVA, Tukey's post-hoc test
6-S2C	fraction of time roaming	wild type, AWC rescue	0.001	***	logit-transformation, One way ANOVA, Tukey's post-hoc test
6-S2C	fraction of time roaming	wild type, ASI rescue	0.00473778	**	logit-transformation, One way ANOVA, Tukey's post-hoc test
6-S2C	fraction of time roaming	tax-4, AWC rescue	0.771724	ns	logit-transformation, One way ANOVA, Tukey's post-hoc test
6-S2C	fraction of time roaming	tax-4, ASI rescue	0.378725	ns	logit-transformation, One way ANOVA, Tukey's post-hoc test
6-S2C	fraction of time roaming	AWC rescue, ASI rescue	0.9	ns	logit-transformation, One way ANOVA, Tukey's post-hoc test
6-S2D	# lawn leaving events	wild type, tax-4	0.0330577	*	Kruskal-Wallis; Dunn's correction
6-S2D	# lawn leaving events	wild type, AWC rescue	1	ns	Kruskal-Wallis; Dunn's correction
6-S2D	# lawn leaving events	wild type, ASI rescue	0.307269	ns	Kruskal-Wallis; Dunn's correction
6-S2D	# lawn leaving events	tax-4, AWC rescue	0.0124421	*	Kruskal-Wallis; Dunn's correction
6-S2D	# lawn leaving events	tax-4, ASI rescue	1	ns	Kruskal-Wallis; Dunn's correction
6-S2D	# lawn leaving events	AWC rescue, ASI rescue	0.136012	ns	Kruskal-Wallis; Dunn's correction
6-S2E	fraction of time roaming	wild type, tax-4	0.00183293	**	logit-transformation, One way ANOVA, Tukey's post-hoc test
6-S2E	fraction of time roaming	wild type, AQR/PQR/URX rescue	0.00644744	**	logit-transformation, One way ANOVA, Tukey's post-hoc test
6-S2E	fraction of time roaming	tax-4, AQR/PQR/URX rescue	0.9	ns	logit-transformation, One way ANOVA, Tukey's post-hoc test
6-S2F	# lawn leaving events	wild type, tax-4	0.0345926	*	Kruskal-Wallis; Dunn's correction
6-S2F	# lawn leaving events	wild type, AQR/PQR/URX rescue	0.0262145	*	Kruskal-Wallis; Dunn's correction
6-S2F	# lawn leaving events	tax-4, AQR/PQR/URX rescue	1	ns	Kruskal-Wallis; Dunn's correction
6-S3B	time to first lawn leaving event, light OFF	wild type, tax-4	2.97337	ns	Kolmogorov-Smirnov 2-sample test, Bonferroni correction
6-S3B	time to first lawn leaving event, light OFF	wild type, ASJ rescue	2.99208	ns	Kolmogorov-Smirnov 2-sample test, Bonferroni correction
6-S3B	time to first lawn leaving event, light OFF	tax-4, ASJ rescue	2.49991	ns	Kolmogorov-Smirnov 2-sample test, Bonferroni correction
6-S3B	time to first head poke, light OFF	wild type, tax-4	0.173879	ns	Kolmogorov-Smirnov 2-sample test, Bonferroni correction
6-S3B	time to first head poke, light OFF	wild type, ASJ rescue	1.37405	ns	Kolmogorov-Smirnov 2-sample test, Bonferroni correction
6-S3B	time to first head poke, light OFF	tax-4, ASJ rescue	2.13922	ns	Kolmogorov-Smirnov 2-sample test, Bonferroni correction
6-S3C	time to first lawn leaving event, light ON	wild type, tax-4	6.8416e-06	****	Kolmogorov-Smirnov 2-sample test, Bonferroni correction
6-S3C	time to first lawn leaving event, light ON	wild type, ASJ rescue	1.82044	ns	Kolmogorov-Smirnov 2-sample test, Bonferroni correction
6-S3C	time to first lawn leaving event, light ON	tax-4, ASJ rescue	0.00121754	**	Kolmogorov-Smirnov 2-sample test, Bonferroni correction
6-S3C	time to first head poke, light ON	wild type, tax-4	0.0236191	*	Kolmogorov-Smirnov 2-sample test, Bonferroni correction
6-S3C	time to first head poke, light ON	wild type, ASJ rescue	0.00743373	**	Kolmogorov-Smirnov 2-sample test, Bonferroni correction
6-S3C	time to first head poke, light ON	tax-4, ASJ rescue	1.59217	ns	Kolmogorov-Smirnov 2-sample test, Bonferroni correction
6-S3D	roaming speed	wild type: min -3 to -1, last 30 sec.	2.32754e-06	****	Wilcoxon rank-sum test
6-S3D	roaming speed	tax-4: min -3 to -1, last 30 sec.	0.00162536	**	Wilcoxon rank-sum test
6-S3D	roaming speed	ASJ rescue: min -3 to -1, last 30 sec.	8.28203e-08	****	Wilcoxon rank-sum test
6-S4A	fraction of time roaming	wild type, tax-4	0.683359	ns	logit-transformation, One way ANOVA, Tukey's post-hoc test
6-S4A	fraction of time roaming	wild type, ASJ rescue	0.573294	ns	logit-transformation, One way ANOVA, Tukey's post-hoc test
6-S4A	fraction of time roaming	tax-4, ASJ rescue	0.273643	ns	logit-transformation, One way ANOVA, Tukey's post-hoc test
6-S4B	# lawn leaving events	wild type, tax-4	1.13004e-05	****	Kruskal-Wallis; Dunn's correction
6-S4B	# lawn leaving events	wild type, ASJ rescue	1	ns	Kruskal-Wallis; Dunn's correction
6-S4B	# lawn leaving events	tax-4, ASJ rescue	9.06621e-05	****	Kruskal-Wallis; Dunn's correction
